# Supplementary material
Source: publisher site journal article supplement (https://www.dovepress.com/article/553377)

Supplementary Table S1. The comprehensive list of IAMC detectable pathogens.

| **Bacteria targets** |  |  |
| --- | --- | --- |
| *Staphylococcus aureus* | *Staphylococcus sciuri* | *Legionella pneumophila* |
| *Streptococcus pneumoniae* | *Streptococcus agalactiae* | *Escherichia coli* |
| *Klebsiella pneumoniae* | *Streptococcus dysgalactiae* | *Enterococcus faecalis* |
| *Acinetobacter baumannii* | *Brucella* | *Enterococcus faecium* |
| *Pseudomonas aeruginosa* | *Haemophilus influenzae* | *Mycobacterium kanasii* |
| *Mycobacterium intracellulare/avium* | *Stenotrophomonas maltophilia* | *Mycobacterium gordonae* |
| *Staphylococcus haemolyticus* | *Mycobacterium tuberculosis* | *Mycobacterium scrofulaceum* |
| *Mycolicibacterium phlei* | *Mycobacterium gilvum* | *Alcaligenes faecalis* |
| *Staphylococcus epidermidis* | *Mycobacterium*  *marnum/ulcerans* | *Mycobacterium*  *chelonae/abscessus* |
| *Streptococcus pyogenes* | *Klebsiella oxytoca* | *Proteus mirabilis* |
| *Klebsiella aerogenes* | *Enterobacter cloacae* | *Neisseria meningitidis* |
| *Clostridium perfringens* | *Burkholderia cepacia* | *Staphylococcus capitis* |
| *Serratia marcescens* | *Morganella morganii* | *Moraxella catarrhalis* |
| *Nocardia* | *Bordetella pertussis* | *Chlamydia pneumoniae* |
| *Avcoplasma pneumoniae* | *lreponema pallidum* | *Borrelia burgdorferi* |
| *Leptospira interrogans* | *Staphylococcus hominis* |  |
| **Fungi targets** |  |  |
| *Candida albicans* | *Candida tropicalis* | *Candida parapsilosis* |
| *Candida kruseii* | *Candida glabrata* | *Aspergillus fumigatus* |
| *Aspergillus flavus* | *Aspergillus niger* | *Aspergillus terreus* |
| *Aspergillus nidulans* | *Cryptococcus neoformans* | *Cryptococcus gattii* |
| *Rhizopus oryzae* | *Lichtheimia corymbifera* | *Rhizomucor pussilus* |
| *Aspergillus calidoustus* | *Pneumocystis jirovecii* | *Mucor circinelloides* |
| *Histoplasma capsulatum* | *Penicillium marneffei* | *Trichosporon asahii* |
| *Candida auris* |  |  |
| **Virus targets** |  |  |
| Human_mastadenovirus_B | Mastadenovirus type 2 | Mastadenovirus type 31 |
| Mastadenovirus type 40 | Mastadenovirus type 41 | Mastadenovirus type 7 |
| Epstein-Barr viru | Herpes simplex virus 1 | Herpes simplex virus 2 |
| Human herpesvirus 5/ Human cytomegalovirus | Human herpesvirus 3/ Varicella zoster virus | Human gammaherpesvirus 8 |
| Human papillomavirus 16 | hepatitis B virus | simian virus 40 |
| Mastadenovirus type 3 | Mastadenovirus type 5 | Mastadenovirus type 14 |
| Mastadenovirus type 21 | Mastadenovirus type 55 | Human bocavirus |

Supplementary Table S2 Comparison between IAMC and CMT.

| IAMC | CMT | | Total |
| --- | --- | --- | --- |
| + - | |
| + | 314 (96.91%) | 37 (62.71%) | 351 |
| - | 10 (3.09%) | 22 (37.29%) | 32 |
| Total | 324 | 59 | 383 |

Sensitivity: 96.91%; specificity: 37.29%, positive predictive value: 89.46%, negative predictive value: 68.75%

Supplementary Table S3 Diagnostic concordance between IAMC and CMTs for different pathogens.

| Pathogen | OR | 95%CI | p |
| --- | --- | --- | --- |
| *Klebsiella pneumoniae* | 3.545 | 2.556-4.916 | <0.001 |
| *Enterococcus* | 13.326 | 6.610-26.868 | <0.001 |
| *Stenotrophomonas maltophilia* | 9.411 | 6.697-13.225 | <0.001 |
| *Pseudomonas aeruginosa* | 1.492 | 1.121-1.984 | <0.05 |
| *Escherichia coli* | 4.214 | 2.794-6.354 | <0.001 |
| *Serratia marcescens* | 2.296 | 1.369-3.852 | 0.001 |
| *Candida albicans* | 5.603 | 3.028-10.370 | <0.001 |
| *Proteus mirabilis* | 2.819 | 1.498-5.304 | 0.001 |
| *Mycobacterium tuberculosis* | 4.846 | 2.317-10.135 | <0.001 |
| *Cryptococcus neoformans, Streptococcus pneumoniae,* Nontuberculous mycobacteria, Viruses | IAMC only | | <0.001 |

Supplementary Table S4 Initial Antibiotics and Potential Pathogen in 17 Patients Warranting Potential Stewardship Strategy Adjustment

| No. | Initial Antibiotics | Potential Pathogen |
| --- | --- | --- |
| 1 | Cefoperazone tazobactam sodium, Levofloxacin | *Klebsiella pneumoniae (KPC)* |
| 2 | Flomoxef | *Klebsiella pneumoniae (KPC)* |
| 3 | Meropenem | *Klebsiella pneumoniae (KPC)* |
| 4 | Meropenem | *Klebsiella pneumoniae (KPC)* |
| 5 | Biapenem | *Stenotrophomonas maltophilia* |
| 6 | Cefoperazone/sulbactam | *Klebsiella pneumoniae (KPC)、Escherichia coli、*Human herpesvirus 4 |
| 7 | Meropenem | *Candida albicans、*Human herpesvirus 4 |
| 8 | Biapenem+Ornidazole | *Pseudomonas aeruginosa* |
| 9 | Meropenem | *Stenotrophomonas maltophilia* |
| 10 | Meropenem+Ornidazole | Human herpesvirus 4 |
| 11 | Biapenem | *Klebsiella pneumoniae (KPC)* |
| 12 | Meropenem+Linezolid | *Staphylococcus aureus* |
| 13 | Cefoperazone/sulbactam+Vancomycin | *Stenotrophomonas maltophilia* |
| 14 | Meropenem | *Klebsiella pneumoniae (KPC)、*Human herpesvirus 4 |
| 15 | Meropenem | *Klebsiella pneumoniae (KPC)* |
| 16 | Meropenem | *Klebsiella pneumoniae (KPC)* |
| 17 | Flomoxef | *Klebsiella pneumoniae (KPC)、*Human herpesvirus 4 |

Potential Pathogen: The IAMC detection results were combined with the traditional microbial detection results, and then the clinical, imaging, and laboratory findings were used to make an assessment. The specific implementation was first determined by two deputy chief physicians in the research team and then discussed by four chief physicians, including one microbiology expert and one microfluidic chip technical expert, to determine the final result (presence of pathogenic bacteria, bacterial infection, Candida or virus colonization, and mixed infection; need to adjust the antibiotic regimen).

Supplementary Table S5 Comparison of KPC and CMT to determine CRE

| *KPC* | CMT |  | Total |
| --- | --- | --- | --- |
| + - | |
| + | 38(69.09%) | 36(31.03%) | 74 |
| - | 17(30.91%) | 80(68.97%) | 97 |
| Total | 55 | 116 | 171 |

Sensitivity: 69.09%; specificity: 68.97%, positive predictive value: 51.35%, negative predictive value: 82.47%

**Supplementary Figure S1** Workflow of IAMC detection. This figure was created with the aid of Biorender (https://biorender. com/).


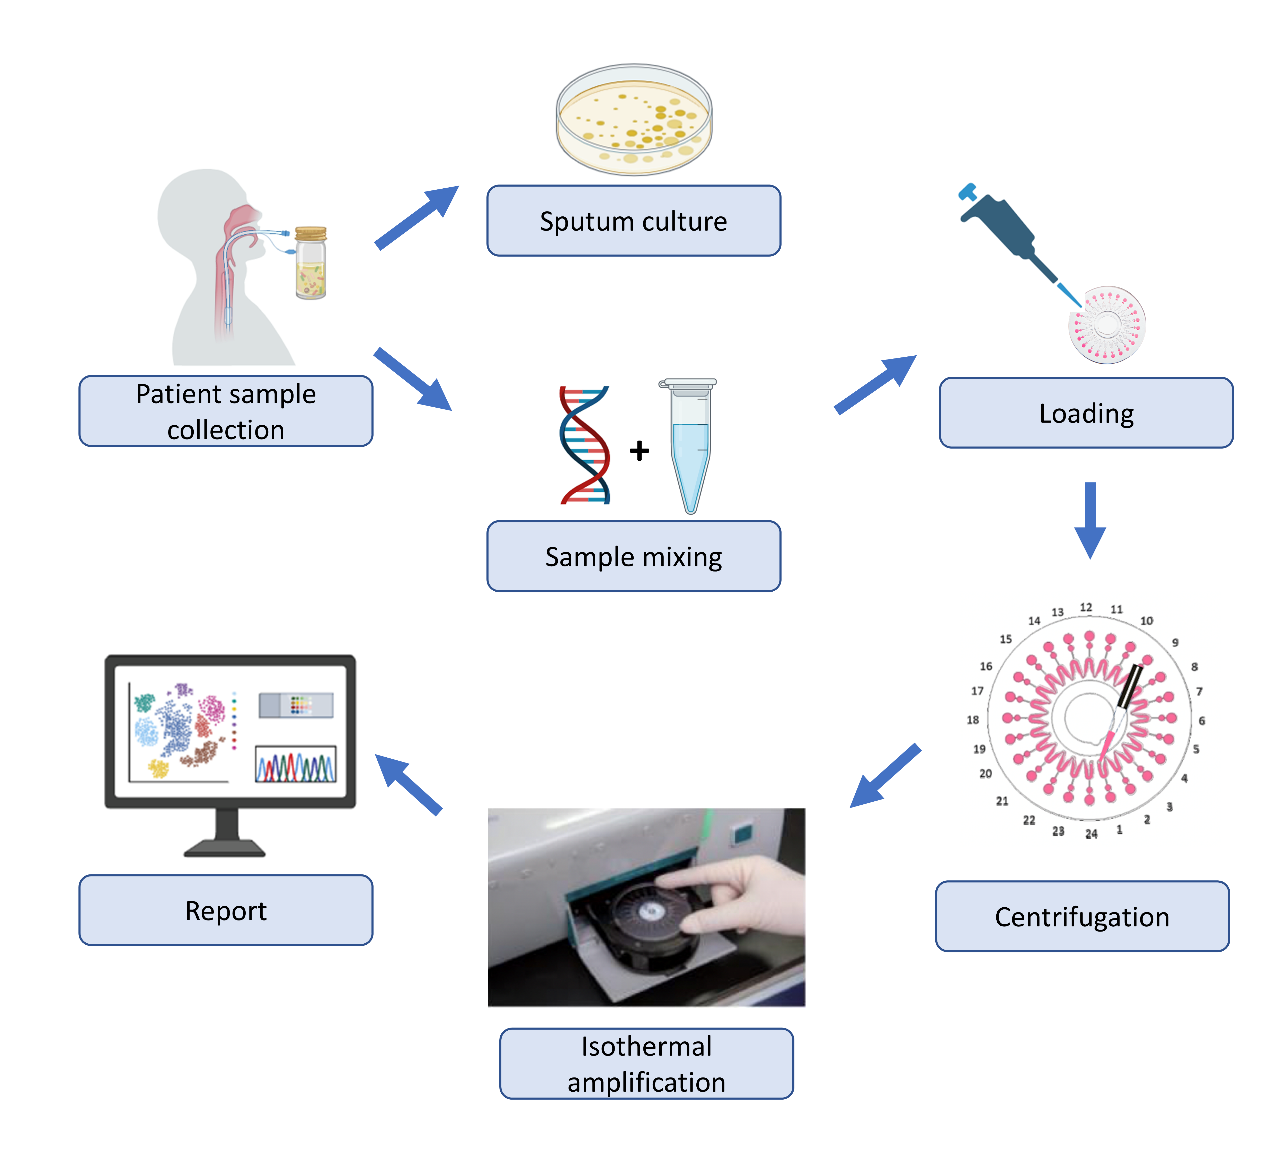

Supplement: Supplementary file 1 [file 553377.docx]
